# Supplementary material for: The aldehyde dehydrogenase AldA contributes to the hypochlorite defense and is redox-controlled by protein S-bacillithiolation in Staphylococcus aureus
Source: PubMed Central journal article supplement — Redox Biol. 2018 Feb 5;15:557–68. doi: 10.1016/j.redox.2018.02.001 (PMC5975064; doi:10.1016/j.redox.2018.02.001), 2018-02-05
Supplement: mmc1.pdf [file mmc1.pdf]

**Table S1: Bacterial strains and plasmids**

| Bacterial strains                                    | Description                                                                                                                                                                                                                                                           | Reference  |
|------------------------------------------------------|-----------------------------------------------------------------------------------------------------------------------------------------------------------------------------------------------------------------------------------------------------------------------|------------|
| <b><i>Escherichia coli</i></b>                       |                                                                                                                                                                                                                                                                       |            |
| DH5 $\alpha$                                         | F- $\phi$ 80d/ <i>lacZ</i> $\Delta$ ( <i>lacZYA-argF</i> ) U169<br><i>deoR</i> supE44 $\Delta$ <i>lacU</i> 169<br>(f80 <i>lacZ</i> DM15) <i>hsdR</i> 17 <i>recA</i> 1<br><i>endA</i> 1 (rk- mk+) supE44 <i>gyrA</i> 96 <i>thi</i> -<br>1 <i>gyrA</i> 69 <i>relA</i> 1 | [1]        |
| BL21(DE3) <i>plysS</i>                               | F- <i>ompT hsdS gal</i> (rb- mb+)<br>DE3(Sam7 $\Delta$ <i>nin5 lacUV5-T7</i><br>Gen1)                                                                                                                                                                                 | [1]        |
| <b><i>Staphylococcus aureus</i></b>                  |                                                                                                                                                                                                                                                                       |            |
| RN4220                                               | restriction negative strain/MSSA<br>cloning intermediate derived from<br>8325-4                                                                                                                                                                                       | [2]        |
| COL                                                  | Archaic HA-MRSA strain                                                                                                                                                                                                                                                | [3]        |
| COL- $\Delta$ <i>aldA</i>                            | COL <i>aldA</i> mutant                                                                                                                                                                                                                                                | This study |
| COL- $\Delta$ <i>aldA</i> :: <i>pRB473-aldA</i>      | COL <i>aldA</i> complemented strain                                                                                                                                                                                                                                   | This study |
| COL- $\Delta$ <i>aldA</i> :: <i>pRB473-aldAC279S</i> | COL <i>aldAC279S</i> complemented<br>strain                                                                                                                                                                                                                           | This study |
| COL- $\Delta$ <i>sigB</i>                            | COL <i>sigB</i> mutant                                                                                                                                                                                                                                                | [4]        |
| <i>Staphylococcus</i> phage 80                       |                                                                                                                                                                                                                                                                       | [5]        |
| <b>Plasmids</b>                                      |                                                                                                                                                                                                                                                                       |            |
| pET11b                                               | <i>E. coli</i> expression plasmid                                                                                                                                                                                                                                     | Novagen    |
| pRB473                                               | pRB373-derivative, <i>E. coli</i> / <i>S. aureus</i> shuttle<br>vector, Amp <sup>r</sup> , Cm <sup>r</sup>                                                                                                                                                            | [6]        |
| pRB473- <i>XylR</i>                                  | pRB373-derivative, <i>E. coli</i> / <i>S. aureus</i> shuttle<br>vector, containing xylose-inducible P <sub><i>Xyl</i></sub><br>promoter<br>Amp <sup>r</sup> , Cm <sup>r</sup>                                                                                         | [7]        |
| pMAD                                                 | Shuttle vector for allelic exchange in<br><i>S. aureus</i> , Amp <sup>r</sup> , Em <sup>r</sup>                                                                                                                                                                       | [8]        |
| pET11b- <i>aldA</i>                                  | pET11b overexpressing His <sub>6</sub> -AldA                                                                                                                                                                                                                          | This study |
| pET11b- <i>aldAC279S</i>                             | pET11b overexpressing His <sub>6</sub> -AldAC279S                                                                                                                                                                                                                     | This study |
| pRB473- <i>aldA</i>                                  | pRB473 expressing <i>aldA</i> under P <sub><i>Xyl</i></sub>                                                                                                                                                                                                           | This study |
| pRB473- <i>aldAC279S</i>                             | pRB473 expressing <i>aldAC279S</i> under P <sub><i>Xyl</i></sub>                                                                                                                                                                                                      | This study |
| pMAD- $\Delta$ <i>aldA</i>                           | pMAD- $\Delta$ <i>aldA</i> for <i>aldA</i> mutant construction                                                                                                                                                                                                        | This study |



**Table S3. Structural comparison of saAldA (PDB 3TY7) with other aldehyde dehydrogenases.**

| PDB ID | Enzyme                                                                                         | R.m.s.d. [Å] | C $\alpha$ atoms aligned | Sequence identity / similarity [%] |
|--------|------------------------------------------------------------------------------------------------|--------------|--------------------------|------------------------------------|
| 3I44   | <i>Bartonella henselae</i><br>aldehyde dehydrogenase<br>(bhADH)                                | 1.39         | 438                      | 41 / 61                            |
| 4I26   | <i>Pseudomonas fluorescens</i><br>2-aminomuconate-6-semialdehyde<br>dehydrogenase<br>(pfAMSDH) | 1.39         | 428                      | 35 / 53                            |
| 2WME   | <i>Pseudomonas aeruginosa</i><br>betaine aldehyde dehydrogenase<br>(paBADH)                    | 1.54         | 434                      | 38 / 57                            |
| 1WND   | <i>Escherichia coli</i><br>aldehyde dehydrogenase<br>(ecADH)                                   | 1.50         | 423                      | 34 / 51                            |
| 4I8P   | <i>Zea mays</i><br>aminoaldehyde dehydrogenase<br>(zmAMADH)                                    | 1.40         | 435                      | 36 / 52                            |
| 4A0M   | <i>Spinacia oleracea</i><br>betaine aldehyde dehydrogenase<br>(soBADH)                         | 1.40         | 433                      | 38 / 57                            |
| 3IWK   | <i>Pisum sativum</i><br>aminoaldehyde dehydrogenase<br>(psAMADH)                               | 1.40         | 432                      | 38 / 57                            |
| 4NU9   | <i>Staphylococcus aureus</i><br>betaine aldehyde dehydrogenase<br>(saBADH)                     | 1.40         | 427                      | 39 / 58                            |
| 4I9B   | <i>Solanum lycopersicum</i><br>aminoaldehyde dehydrogenase<br>(sIAMADH)                        | 1.43         | 434                      | 39 / 56                            |
| 1O05   | <i>Homo sapiens</i><br>mitochondrial aldehyde<br>dehydrogenase<br>(hsALDH2)                    | 1.43         | 426                      | 35 / 52                            |

Figure S1

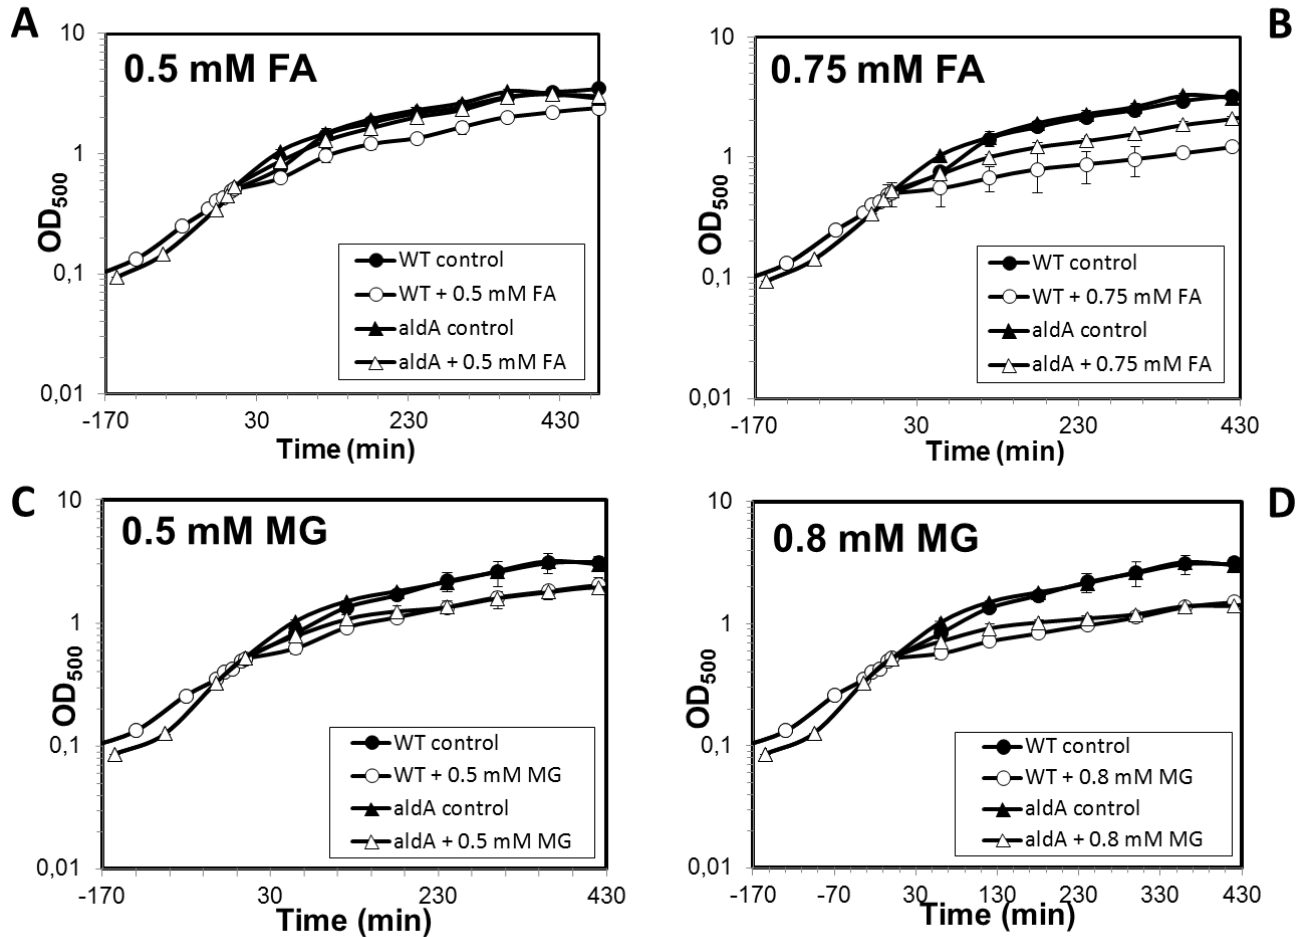

Figure S1: Growth curves of *S. aureus* COL wild type and the *aldA* deletion mutant after exposure to formaldehyde (A,B) and methylglyoxal (C,D). The *S. aureus* COL wild type and the *aldA* deletion mutant were grown in RPMI medium and exposed to sub-lethal concentrations of 0.5 mM and 0.75 mM formaldehyde (A,B), 0.5 mM and 0.8 mM methylglyoxal (C,D) at an OD<sub>540</sub> of 0.5 during the log phase. No growth phenotype of the *aldA* mutant was detected under aldehyde stress.

**Figure S2**

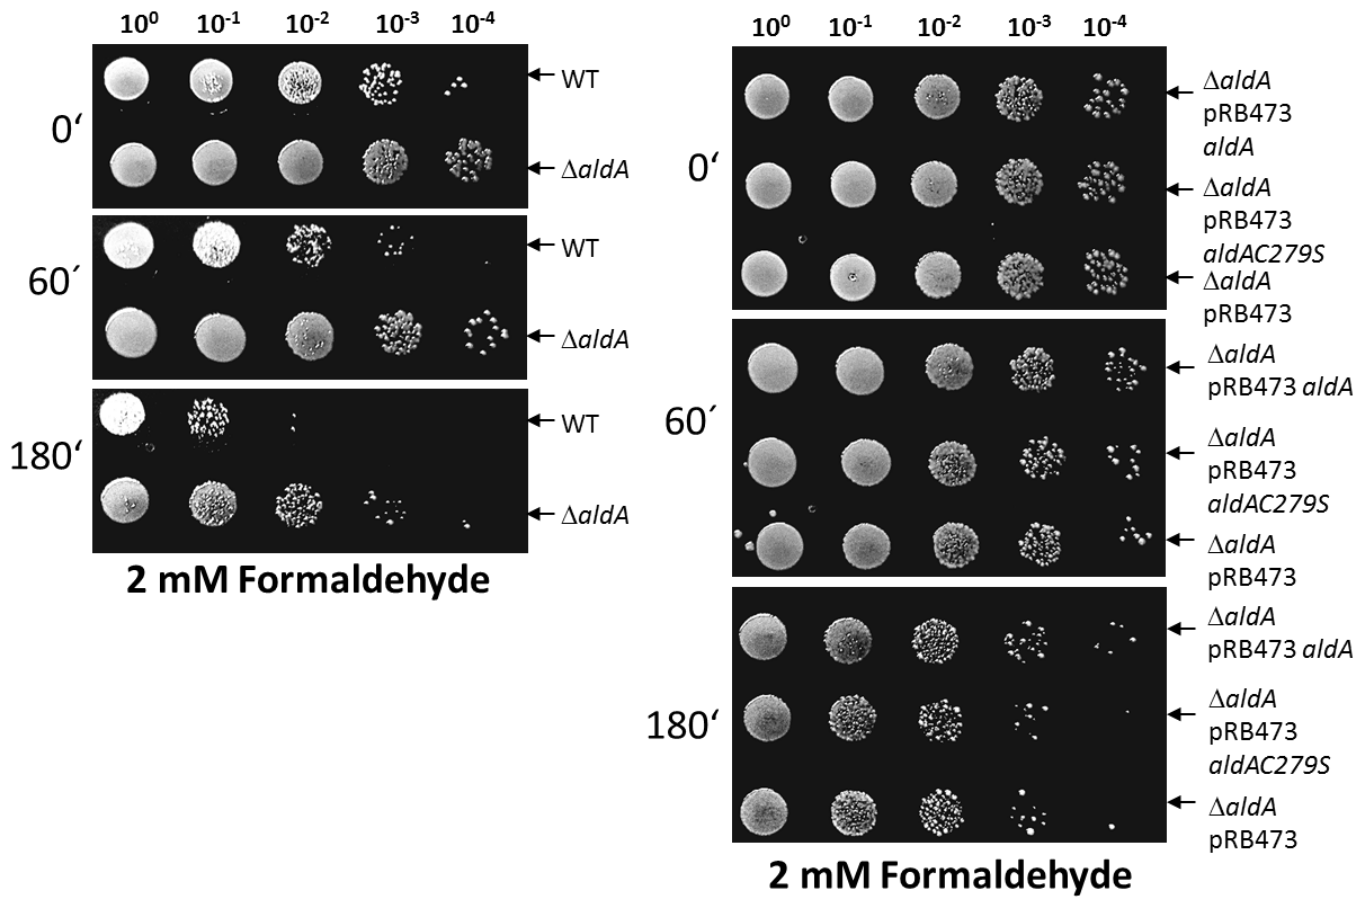

**Figure S2. AldA is not required for the survival of *S. aureus* under formaldehyde stress.** For the survival phenotype assays, *S. aureus* COL wild-type (WT), the  $\Delta aldA$  deletion mutant (A) and the *aldA* and *aldAC279S* complemented  $\Delta aldA$  mutants ( $\Delta aldA$  pRB473*aldA* and  $\Delta aldA$  pRB473*aldAC279S*) (B) were grown in RPMI until an OD<sub>500</sub> of 0.5 and treated with 2 mM formaldehyde stress. Survival assays were performed by spotting 10  $\mu$ l of serial dilutions after 1 and 3 hours of NaOCl exposure onto LB agar plates.

**Figure S3**

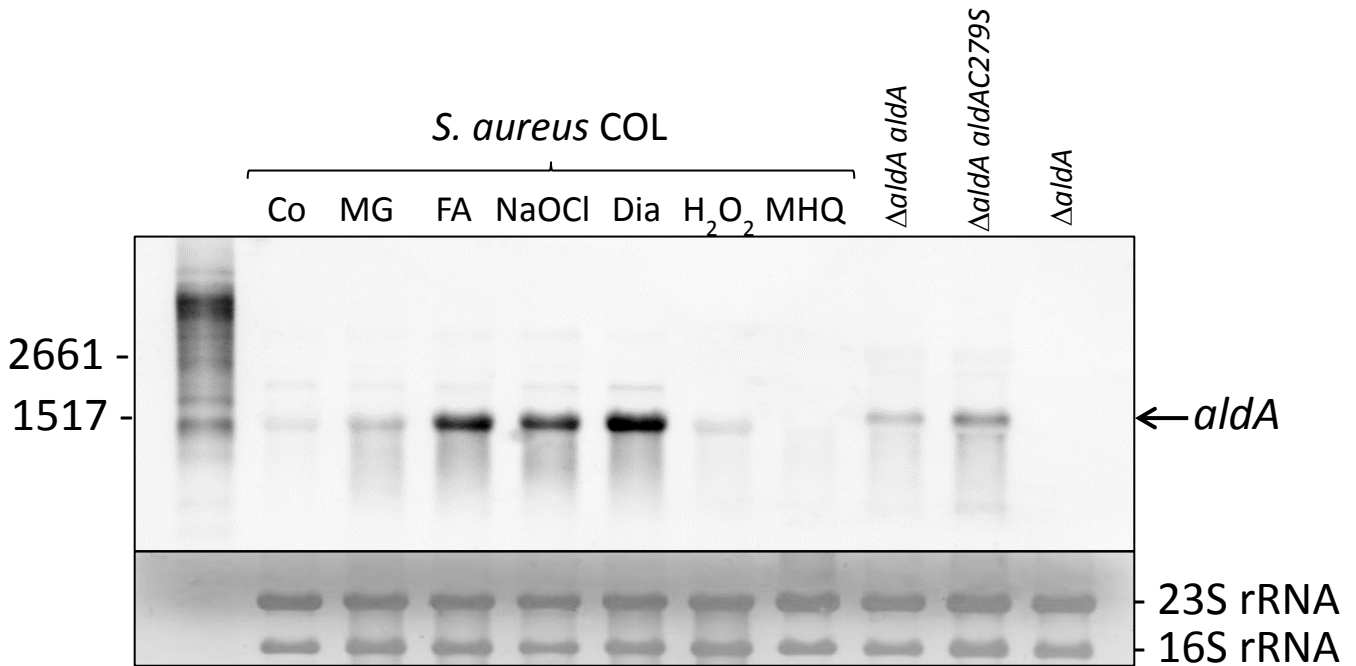

**Figure S3: Transcriptional induction of *aldA* under formaldehyde, methylglyoxal, NaOCl, diamide, H<sub>2</sub>O<sub>2</sub> and MHQ stress in the *S. aureus* COL wild type,  $\Delta aldA$  mutant, *aldA* and *aldAC279S* complemented  $\Delta aldA$  mutant strains.** RNA was isolated from *S. aureus* COL wild type under control, 0.75 mM formaldehyde (FA), 0.5 mM methylglyoxal (MG), 1 mM NaOCl, 2 mM diamide, 10 mM H<sub>2</sub>O<sub>2</sub> and 50  $\mu$ M methylhydroquinone (MHQ) stress conditions. RNA samples were also prepared from the  $\Delta aldA$  mutant as well as from the *aldA* or *aldAC279S* complemented strains under control conditions in the presence of 1% xylose. The RNA samples were subjected to Northern blot analysis for *aldA* (SACOL2114) transcription. The successful *aldA* and *aldAC279S* complementations are indicated. The methylene blue stain is the RNA loading control showing the abundant 16S and 23S rRNAs.

Figure S4

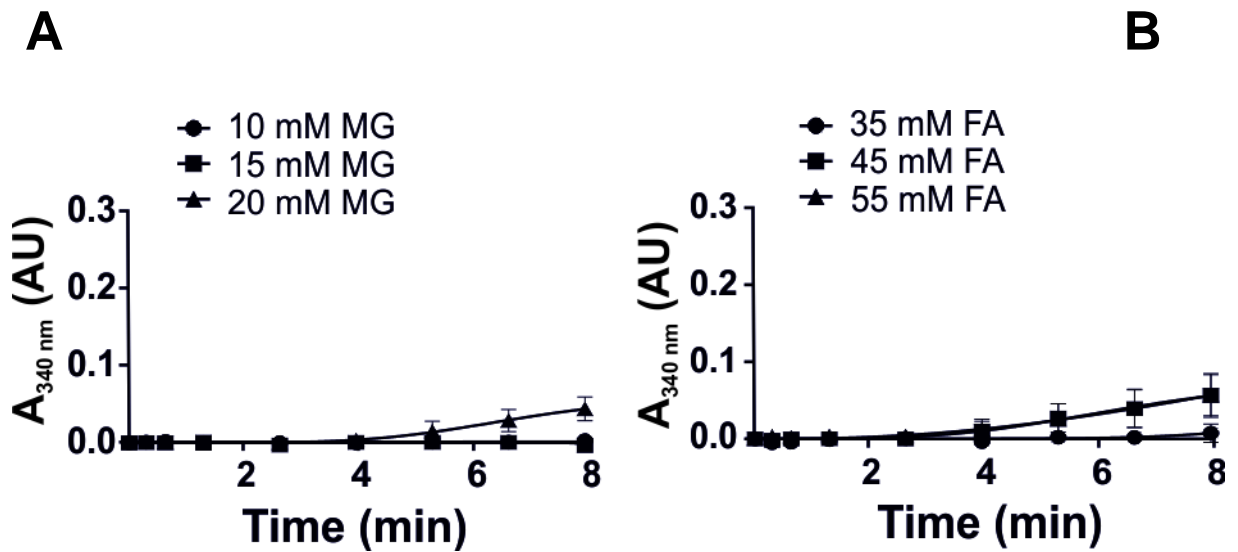

**Figure S4. Cys279 is essential for AldA activity towards methylglyoxal and formaldehyde oxidation.** Purified AldAC279S shows no significant activity for oxidation of methylglyoxal (MG) (A) and formaldehyde (FA) (B) and *in vitro*. Reduced AldAC279S protein (2.5  $\mu$ M) was incubated with different concentrations of methylglyoxal (A) and formaldehyde (B) in reaction buffer (100 mM Tris HCl, 1.25 mM EDTA, pH 7.5). The oxidation of the aldehydes was measured in the presence of  $\text{NAD}^+$  as coenzyme and NADH generation was monitored at 340 nm using a spectrophotometer. The results are from 3 replicate experiments. Error bars represent the SEM.

# Figure S5

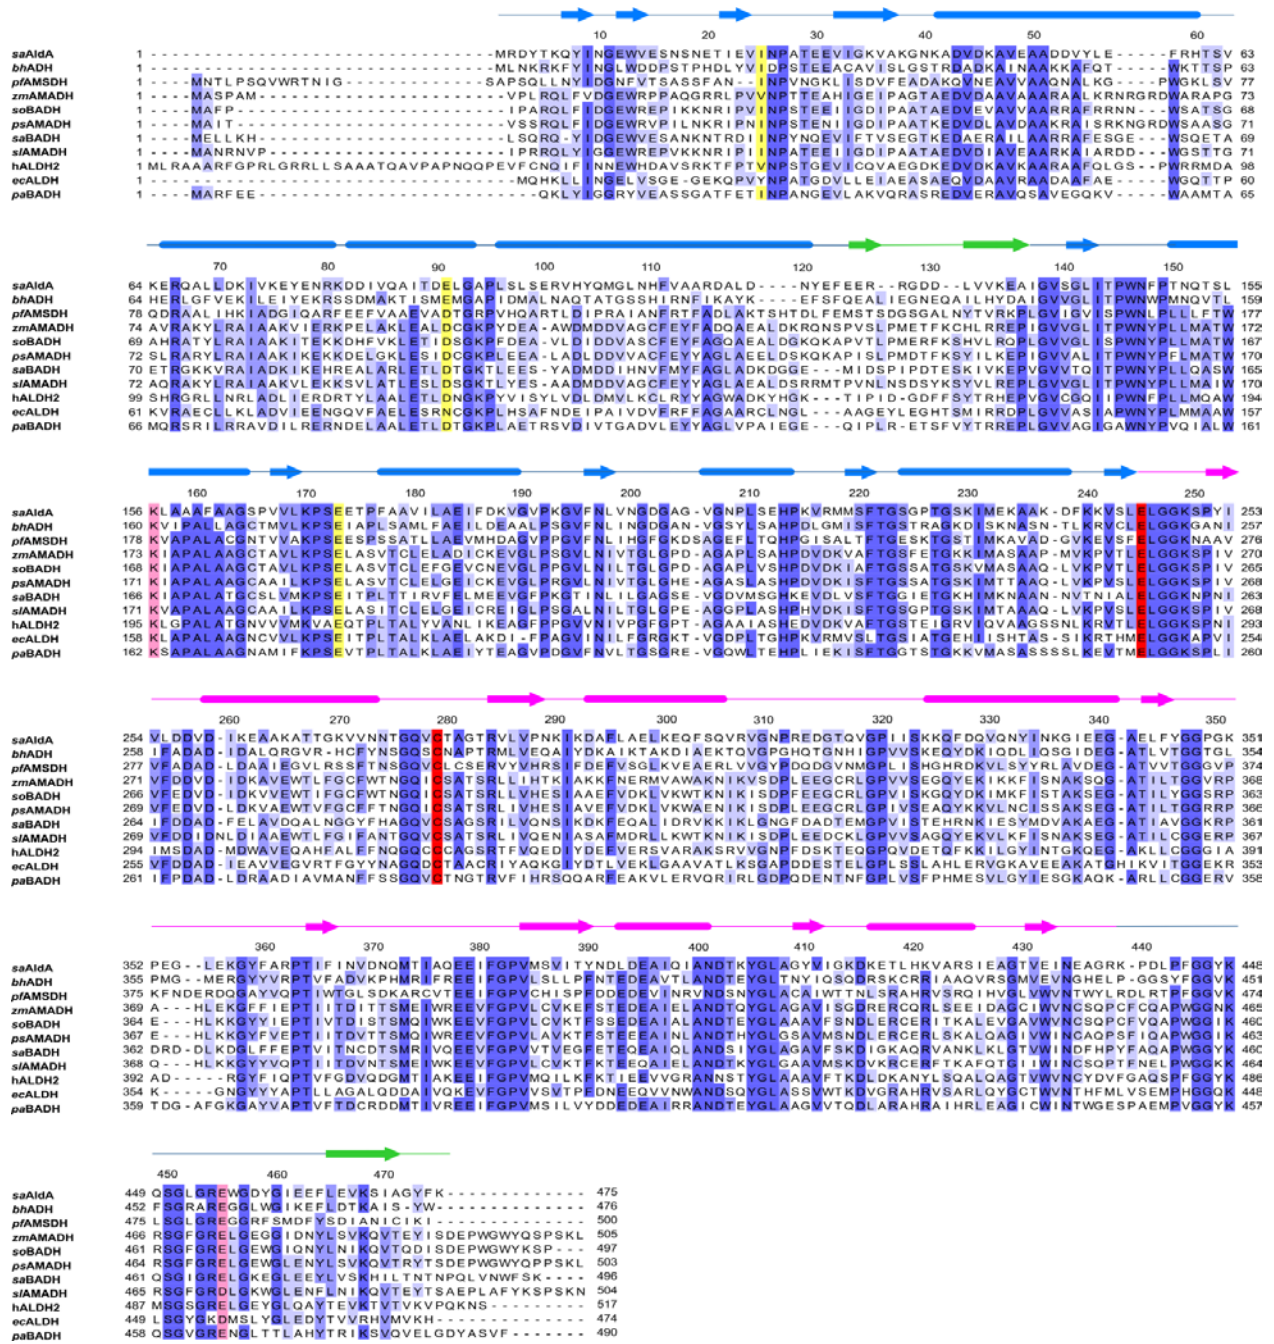

**Figure S5.** Sequence alignment of *saAldA* and other ADHs (as in Table S3). Amino acid sequences were aligned using ClustalΩ [9] and presented using Jalview [10]. Intensity of the blue color gradient is based on sequence identities and similarities. The highly conserved residues are highlighted with colors (catalytic and glutamate residues – red, glutamate and lysine residues involved in catalysis – light pink; cation-binding residues – yellow). The secondary structure elements above the alignment correspond to the apo-*saAldA* structure and are colored by domains (CoBD – blue; SID – green; CD – magenta). Numbering above the alignment is according to *saAldA*.



### Figure S6

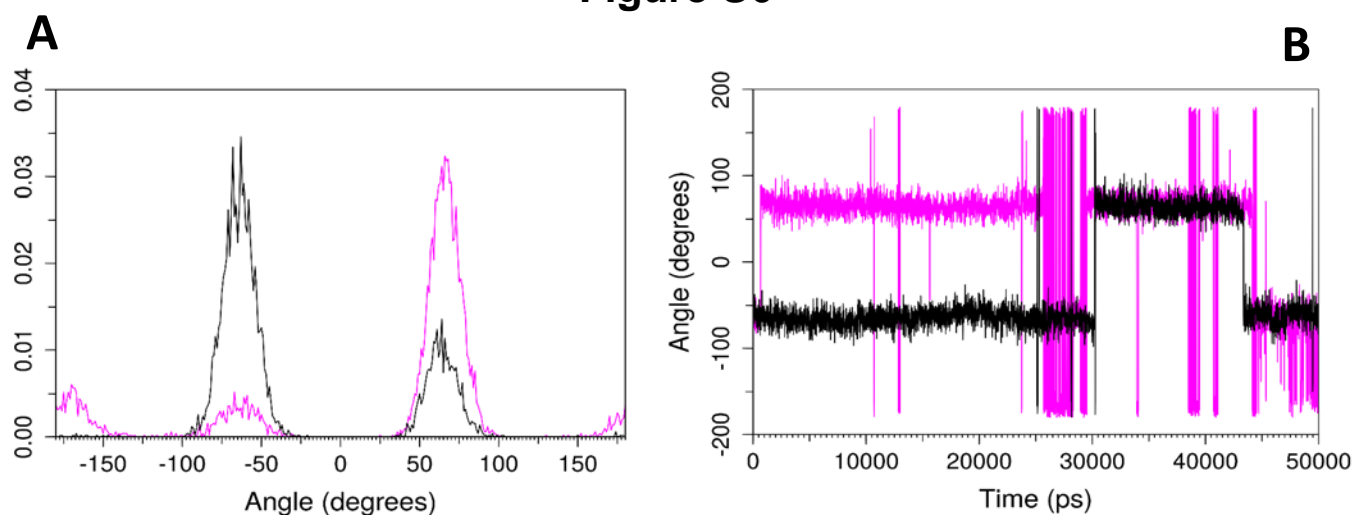

**Figure S6.** Plot of the dihedral distribution of N-CA-CB-SG dihedral (rotation around the CA-CB bond) of AldA Cys279 (A) and plot of the dihedral angle of AldA Cys279 in the apo- and holo-enzymes as the function of the simulation time (B). The plots show that Cys279 in the apo-enzyme (black) has very different dihedral propensity than in the holo-enzyme complex with NAD<sup>+</sup> (magenta), explaining the preference of Cys279 to form the BSH complex in the apo-enzyme in the “resting” (Q2) position and in the holo-enzyme in the “attacking” (Q1) positions.

### Figure S7

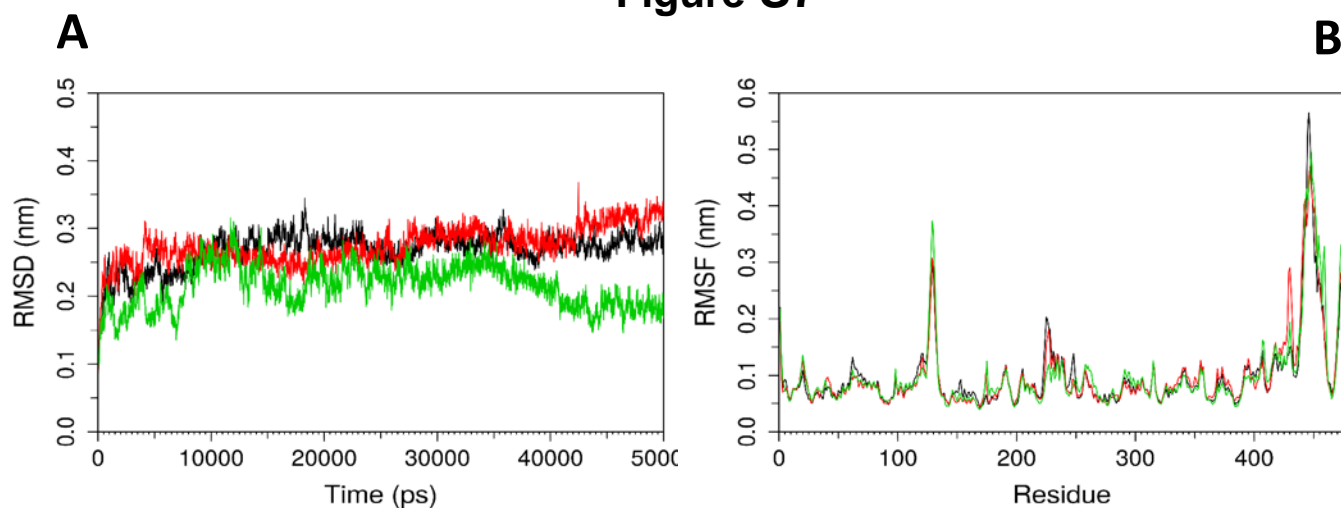

**Figure S7.** S-bacillithiolation of AldA Cys279 does not require major structural changes as revealed by MD simulations. Root-mean-square deviation (RMSD) of AldA protein backbone (A) and per-residue average root mean square fluctuation (RMSF) (B) during 50 ns of MD simulations of AldA apo-enzyme (black), AldA holo-enzyme complex with BSH in “attacking” (Q1) position (red), and AldA apo-enzyme complexes with BSH in “resting” (Q2) position (green). S-bacillithiolation resulted in little change in the backbone flexibility of AldA between the complexes of BSH with the apo-enzyme (Q2), the holo-enzyme (Q1) and the apo-enzyme without BSH.

## REFERENCES

- [1] Studier, F. W.; Moffatt, B. A. Use of Bacteriophage-T7 RNA-Polymerase to Direct Selective High-Level Expression of Cloned Genes. *J Mol Biol* **189**:113-130; 1986.
- [2] Kreiswirth, B. N.; Lofdahl, S.; Betley, M. J.; O'Reilly, M.; Schlievert, P. M.; Bergdoll, M. S.; Novick, R. P. The toxic shock syndrome exotoxin structural gene is not detectably transmitted by a prophage. *Nature* **305**:709-712; 1983.
- [3] Shafer, W. M.; Landolo, J. J. Genetics of staphylococcal enterotoxin B in methicillin-resistant isolates of *Staphylococcus aureus*. *Infect Immun* **25**:902-911; 1979.
- [4] Pane-Farre, J.; Jonas, B.; Förstner, K.; Engelmann, S.; Hecker, M. The sigmaB regulon in *Staphylococcus aureus* and its regulation. *Int J Med Microbiol* **296**:237-258; 2006.
- [5] Rosenblum, E. D.; Tyrone, S. Serology, Density, and Morphology of Staphylococcal Phages. *J Bact* **88**:1737-1742; 1964.
- [6] Bruckner, R.; Wagner, E.; Gotz, F. Characterization of a sucrase gene from *Staphylococcus xylosus*. *J Bact* **175**: 851-857; 1993.
- [7] Pöther, D. C.; Gierok, P.; Harms, M.; Mostertz, J.; Hochgräfe, F.; Antelmann, H.; Hamilton, C. J.; Borovok, I.; Lalk, M.; Aharonowitz, Y.; Hecker, M. Distribution and infection-related functions of bacillithiol in *Staphylococcus aureus*. *Int J Med Microbiol* **303**:114-123; 2013.
- [8] Arnaud, M.; Chastanet, A.; Debarbouille, M. New vector for efficient allelic replacement in naturally nontransformable, low-GC-content, gram-positive bacteria. *Appl Environ Microbiol* **70**:6887-6891; 2004.
- [9] Sievers, F.; Wilm, A.; Dineen, D.; Gibson, T. J.; Karplus, K.; Li, W.; Lopez, R.; McWilliam, H.; Remmert, M.; Soding, J.; Thompson, J. D.; Higgins, D. G. Fast, scalable generation of high-quality protein multiple sequence alignments using Clustal Omega. *Mol Sys Biol* **7**:539; 2011.
- [10] Waterhouse, A. M.; Procter, J. B.; Martin, D. M.; Clamp, M.; Barton, G. J. Jalview Version 2--a multiple sequence alignment editor and analysis workbench. *Bioinformatics* **25**:1189-1191; 2009.
